# Supplementary material for: Cortical representation of different taste modalities on the gustatory cortex: A pilot study
Source: PubMed Central journal article supplement (PMC5744997; doi:10.1371/journal.pone.0190164), 2017-12-27

## TASTE PERCEPTION EVALUATION

Indicate the perceived taste with a cross and fill the VAS with a vertical line according to the perceived degree of perception

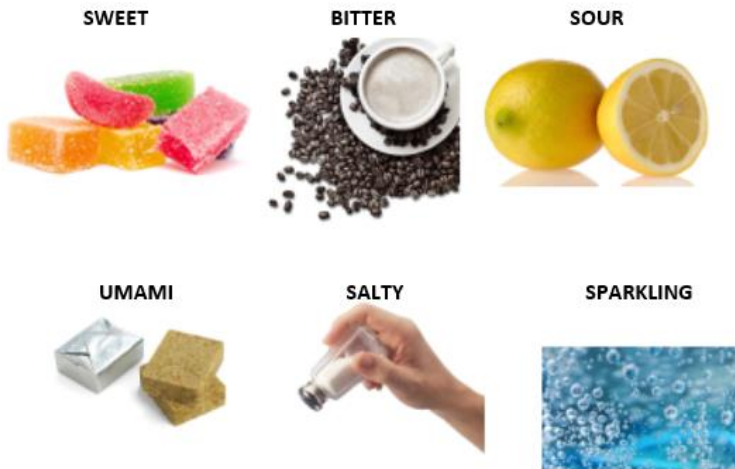

1) Which of the following tastes did you perceive after swallowing the first solution?

- A. Sweet
- B. Bitter
- C. Sour
- D. Umami (similar to stock cube)
- E. Salty
- F. Sparkling

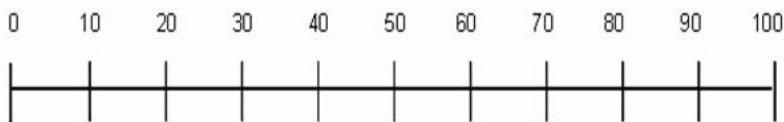

2) Which of the following tastes did you perceive after swallowing the second solution?

- A. Sweet
- B. Bitter
- C. Sour
- D. Umami (similar to stock cube)
- E. Salty
- F. Sparkling

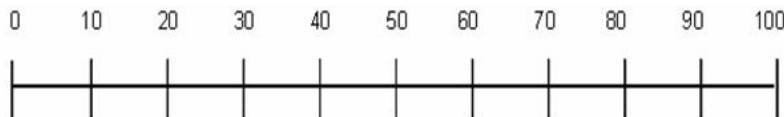

**3) Which of the following tastes did you perceive after swallowing the third solution?**

- A. Sweet
- B. Bitter
- C. Sour
- D. Umami (similar to stock cube)
- E. Salty
- F. Sparkling

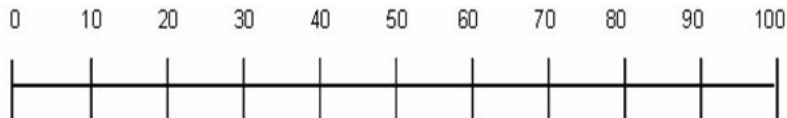

**4) Which of the following tastes did you perceive after swallowing the fourth solution?**

- A. Sweet
- B. Bitter
- C. Sour
- D. Umami (similar to stock cube)
- E. Salty
- F. Sparkling

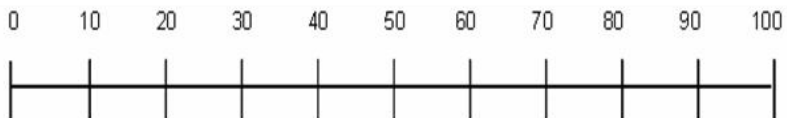

**5) Which of the following tastes did you perceive after swallowing the fifth solution?**

- A. Sweet
- B. Bitter
- C. Sour
- D. Umami (similar to stock cube)
- E. Salty
- F. Sparkling

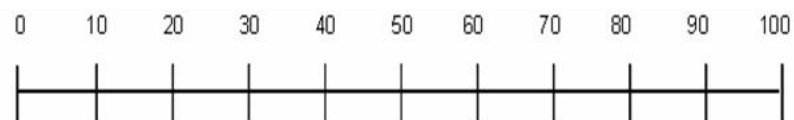

6) Which of the following tastes did you perceive after swallowing the sixth solution?

- A. Sweet
- B. Bitter
- C. Sour
- D. Umami (similar to stock cube)
- E. Salty
- F. Sparkling

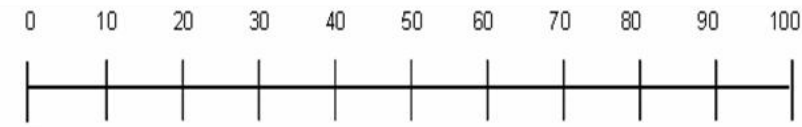

Supplement: pone.0190164.s001.pdf [file pone.0190164.s001.pdf]
