# Supplementary material for: Cortical representation of different taste modalities on the gustatory cortex: A pilot study
Source: PLoS One. 2017 Dec 27;12(12):e0190164. doi: 10.1371/journal.pone.0190164 (PMC5744997; doi:10.1371/journal.pone.0190164)

## VALUTAZIONE PERCEZIONE GUSTATIVA

Indicare con una crocetta il gusto percepito e compilare la VAS con una linea verticale secondo il grado di percezione sentito

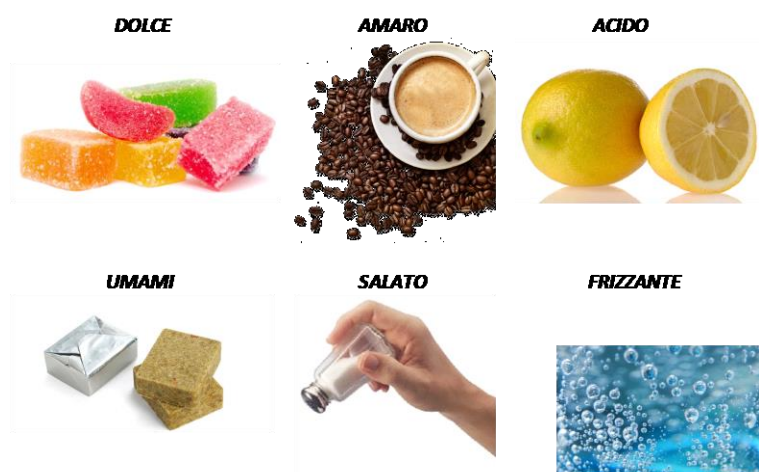

**1) Quale dei seguenti gusti hai percepito in seguito alla deglutizione della prima soluzione?**

- A. Dolce
- B. Amaro
- C. Acido
- D. Umami (tipo dado da brodo)
- E. Salato (tipo sale da cucina)
- F. Frizzante

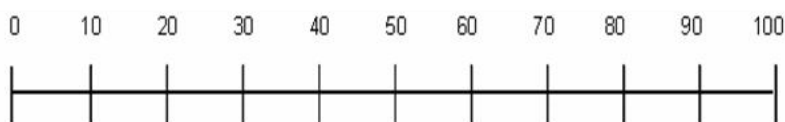

**2) Quale dei seguenti gusti hai percepito in seguito alla deglutizione della seconda soluzione?**

- A. Dolce
- B. Amaro
- C. Acido
- D. Umami (tipo dado da brodo)
- E. Salato (tipo sale da cucina)
- F. Frizzante

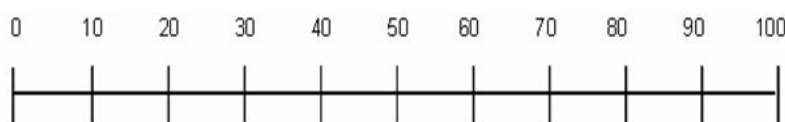

**3) Quale dei seguenti gusti hai percepito in seguito alla deglutizione della terza soluzione?**

- A. Dolce
- B. Amaro
- C. Acido
- D. Umami (tipo dado da brodo)
- E. Salato (tipo sale da cucina)
- F. Frizzante

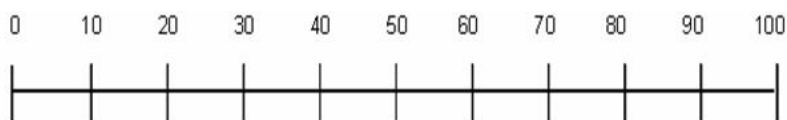

**4) Quale dei seguenti gusti hai percepito in seguito alla deglutizione della quarta soluzione?**

- A. Dolce
- B. Amaro
- C. Acido
- D. Umami (tipo dado da brodo)
- E. Salato (tipo sale da cucina)
- F. Frizzante

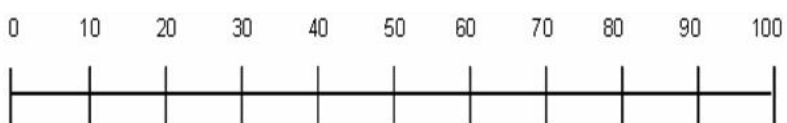

**5) Quale dei seguenti gusti hai percepito in seguito alla deglutizione della quinta soluzione?**

- A. Dolce
- B. Amaro
- C. Acido
- D. Umami (tipo dado da brodo)
- E. Salato (tipo sale da cucina)
- F. Frizzante

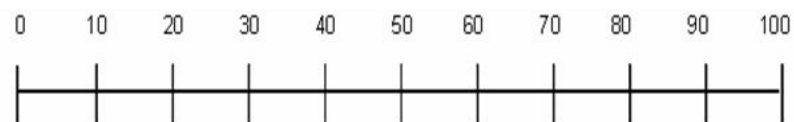

**6) Quale dei seguenti gusti hai percepito in seguito alla deglutizione della sestasoluzione?**

- A. Dolce
- B. Amaro
- C. Acido
- D. Umami (tipo dado da brodo)
- E. Salato (tipo sale da cucina)
- F. Frizzante

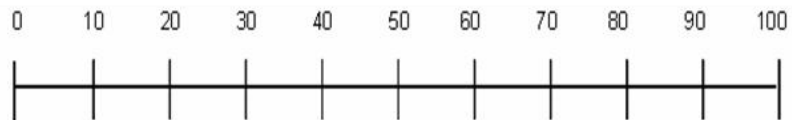

Supplement: S2 File — The file contains the Visual Analogue Scale Questionnaire that was presented to the subjects during the Behavioral Test (original Italian version). (PDF) [file pone.0190164.s002.pdf]
